# Supplementary material for: Do AutoML-Based QSAR Models Fulfill OECD Principles for Regulatory Assessment? A 5-HT1A Receptor Case
Source: MDPI journal article supplement (doi:10.3390/pharmaceutics14071415), 2022-07-06
Supplement: s1 [file s1]

**Table S3.** Summary of features importance.  $av|SHAP|$ —mean absolute SHAP value; SMR VSA3—MOE MR VSA Descriptor 3; GATS3p—Geary autocorrelation of lag 3 weighted by polarizability; PEOE VSA2—MOE Charge VSA Descriptor 2; SaaaC—sum of aaaC; AATSC3se—averaged and centered Moreau-Broto autocorrelation of lag 3 weighted by Sanderson EN; nBondsS—number of single bonds in non-kekulized structure; AATS6dv—averaged Moreau-Broto autocorrelation of lag 6 weighted by valence electrons; GATS6p—Geary coefficient of lag 6 weighted by polarizability; PEOE VSA9—MOE Charge VSA Descriptor 9; IC2—2-ordered neighborhood information content; SLogP—Wildman-Crippen LogP; SpMAD Dzi—spectral mean absolute deviation from Barysz matrix weighted by ionization potential; JGI8—8-ordered mean topological charge; SlogP VSA1—MOE logP VSA Descriptor 1; MATS5d—Moran coefficient of lag 5 weighted by sigma electrons; ATSC5i—centered Moreau-Broto autocorrelation of lag 5 weighted by ionization potential; SpMAD Dzse—spectral mean absolute deviation from Barysz matrix weighted by Sanderson EN; GATS8se—geary coefficient of lag 8 weighted by Sanderson EN; VSA EState1—VSA EState Descriptor; SlogP VSA3—MOE logP VSA Descriptor 3; PEOE VSA8—MOE Charge VSA Descriptor 8; JGI4—4-ordered mean topological charge; SsssCH—sum of sssCH; SlogP VSA11—MOE logP VSA Descriptor 11; GATS6are—Geary coefficient of lag 6 weighted by allred-rocw EN; SdO—sum of dO; JGI9—9-ordered mean topological charge; AATS7i—averaged Moreau-Broto autocorrelation of lag 7 weighted by ionization potential; GATS7s—Geary coefficient of lag 7 weighted by intrinsic state; JGI7—7-ordered mean topological charge; CIC5—5-ordered complementary information content; Estate VSA6—EState VSA Descriptor 6; MATS7se—Moran coefficient of lag 7 weighted by Sanderson EN; VSA EState5—EState VSA Descriptor 5; nBase—basic group count; MATS7c—Moran coefficient of lag 7 weighted by Gasteiger charge; GGI8—8-ordered raw topological charge; SaasN—sum of aasN; SaasN—Geary coefficient of lag 8 weighted by intrinsic state.

| Variable  | $av SHAP $ | Variable    | $av SHAP $ | Variable    | $av SHAP $ |
|-----------|------------|-------------|------------|-------------|------------|
| SMR VSA3  | 0.088      | SlogP VSA1  | 0.062      | JGI9        | 0.041      |
| GATS3p    | 0.088      | MATS5d      | 0.061      | AATS7i      | 0.039      |
| PEOE VSA2 | 0.083      | ATSC5i      | 0.060      | GATS7s      | 0.039      |
| SaaaC     | 0.083      | SpMAD Dzse  | 0.059      | JGI7        | 0.038      |
| AATSC3se  | 0.082      | GATS8se     | 0.055      | CIC5        | 0.037      |
| nBondsS   | 0.078      | VSA EState1 | 0.053      | Estate VSA6 | 0.033      |
| AATS6dv   | 0.073      | SlogP VSA3  | 0.052      | MATS7se     | 0.032      |
| GATS6p    | 0.071      | PEOE VSA8   | 0.050      | VSA EState5 | 0.032      |
| PEOE VSA9 | 0.071      | JGI4        | 0.048      | nBase       | 0.029      |
| IC2       | 0.069      | SsssCH      | 0.048      | MATS7c      | 0.028      |
| SLogP     | 0.066      | SlogP VSA11 | 0.046      | GGI8        | 0.028      |
| SpMAD Dzi | 0.062      | GATS6are    | 0.046      | SaasN       | 0.022      |
| JGI8      | 0.062      | SdO         | 0.043      | GATS8s      | 0.021      |
