# Supplementary figures and images for: Do AutoML-Based QSAR Models Fulfill OECD Principles for Regulatory Assessment? A 5-HT1A Receptor Case
Source: MDPI journal article supplement (doi:10.3390/pharmaceutics14071415), 2022-07-06

Residual Analysis for "StackedEnsemble\_AllModels\_AutoML\_20210902\_051708"

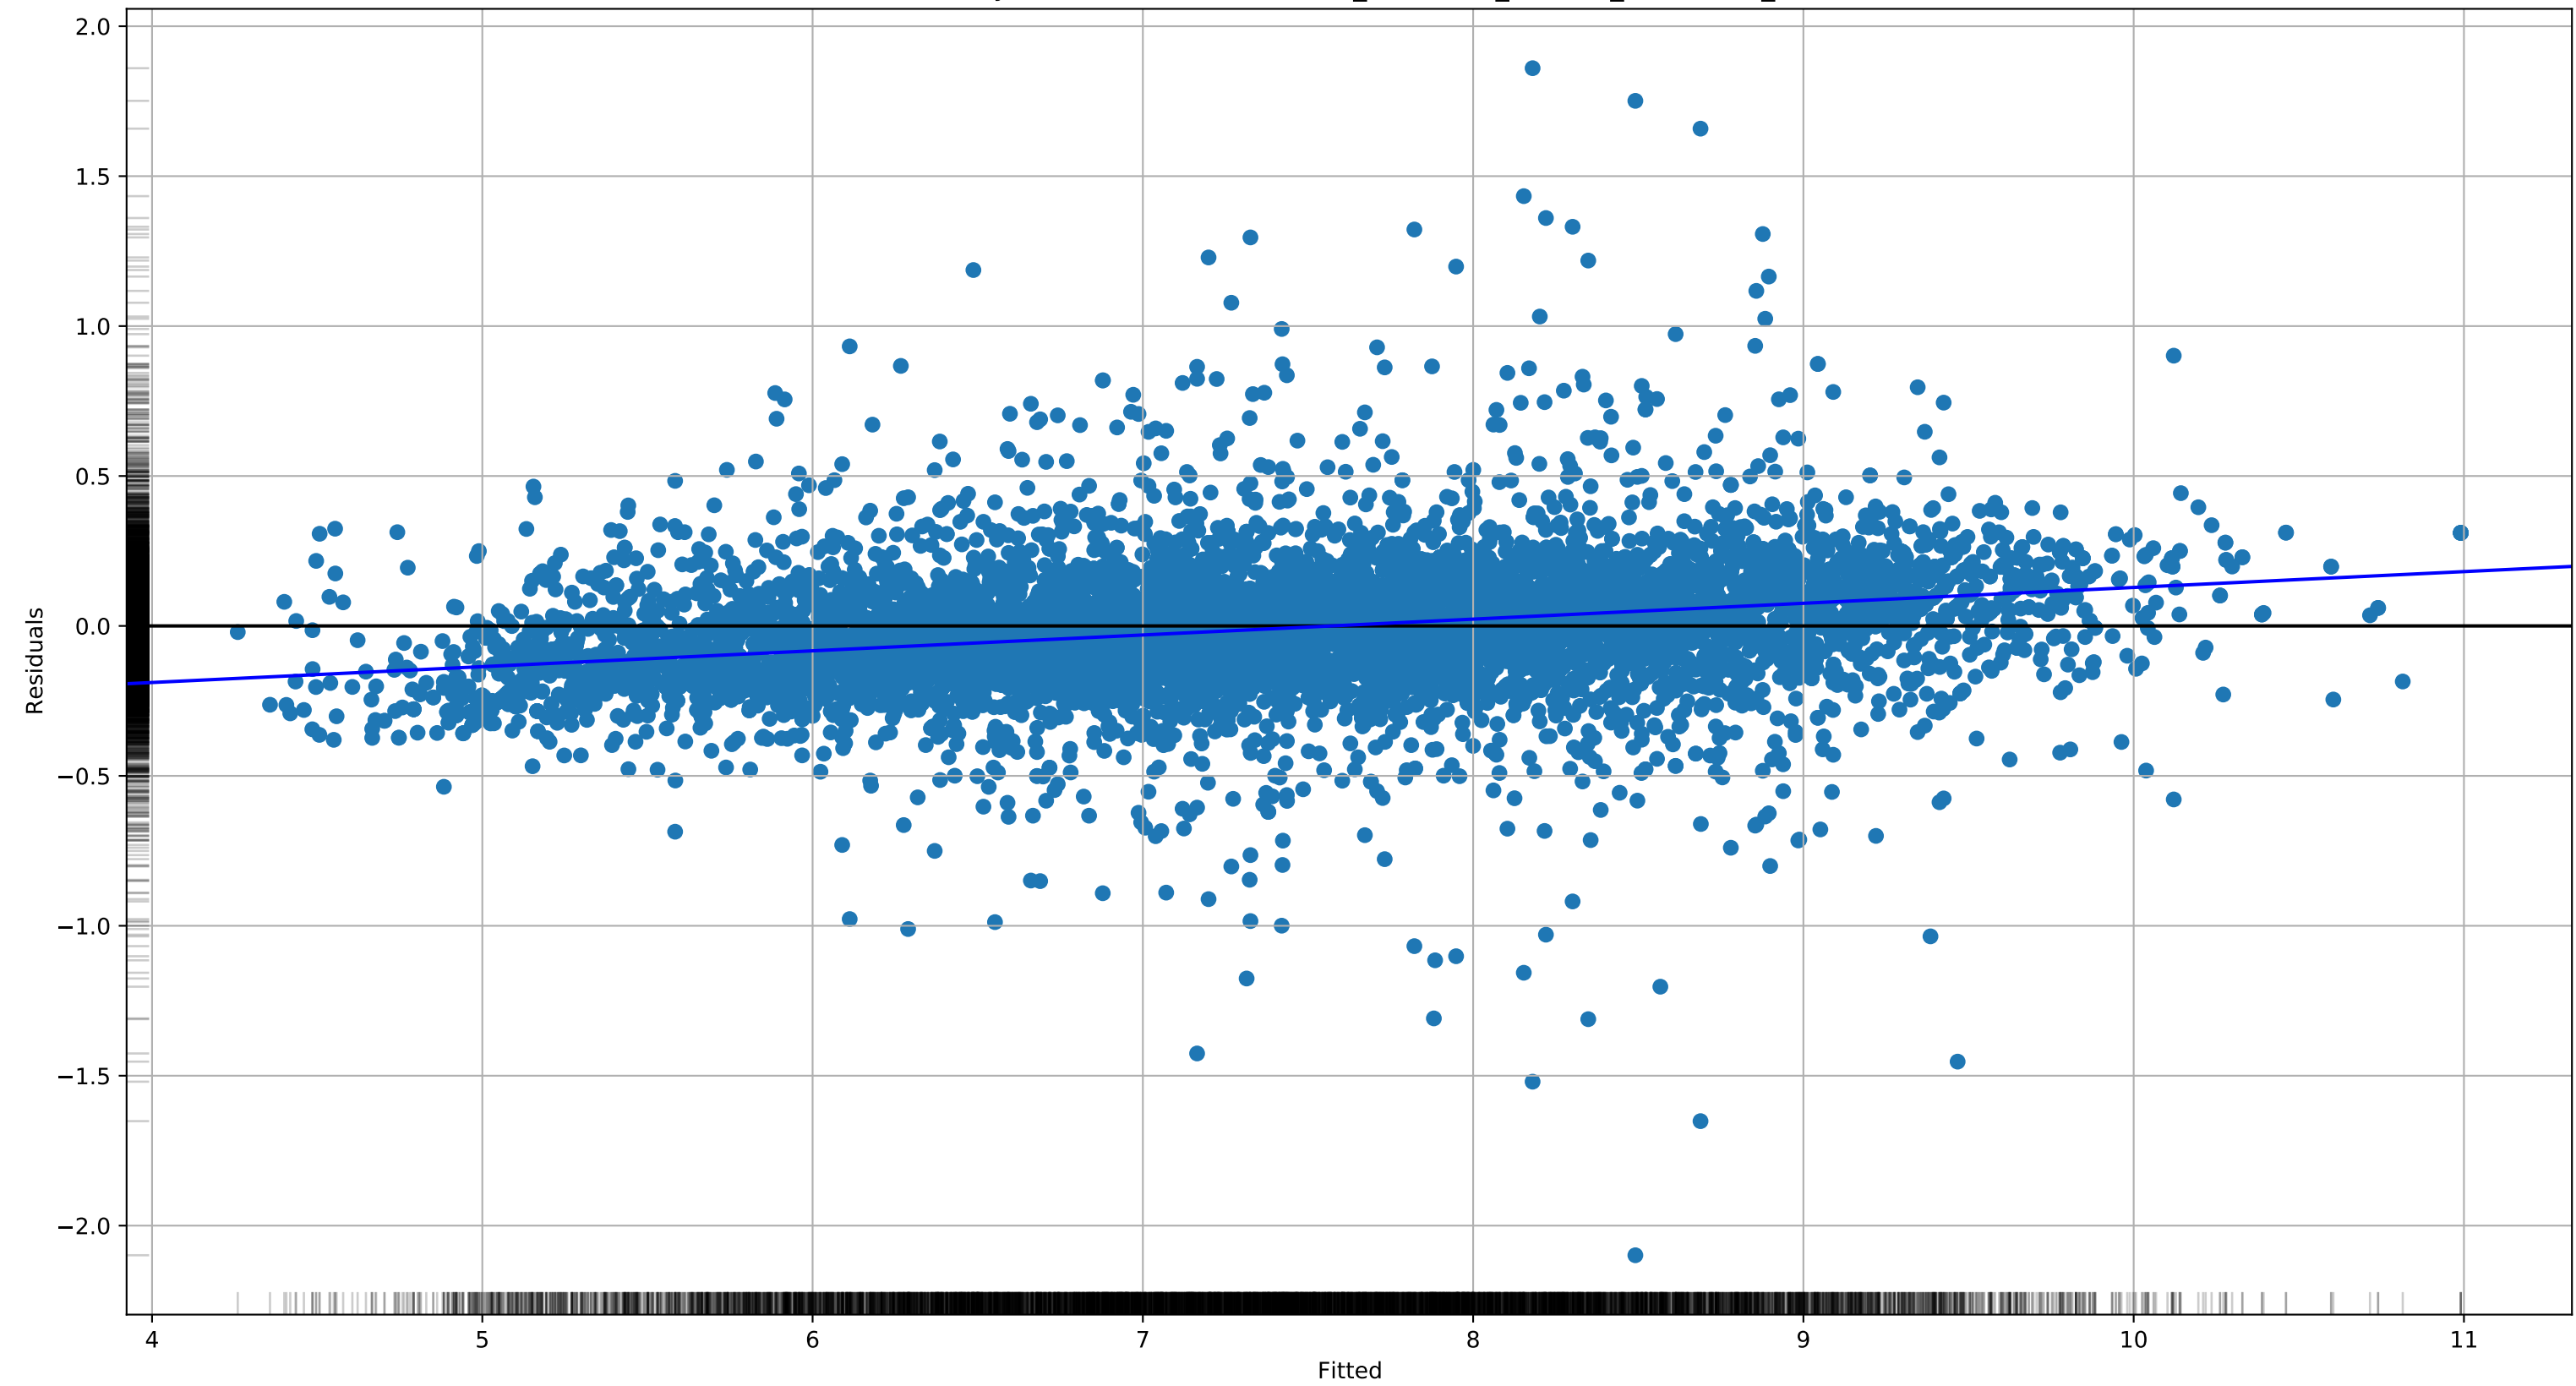

Supplement: s1 [file s1]

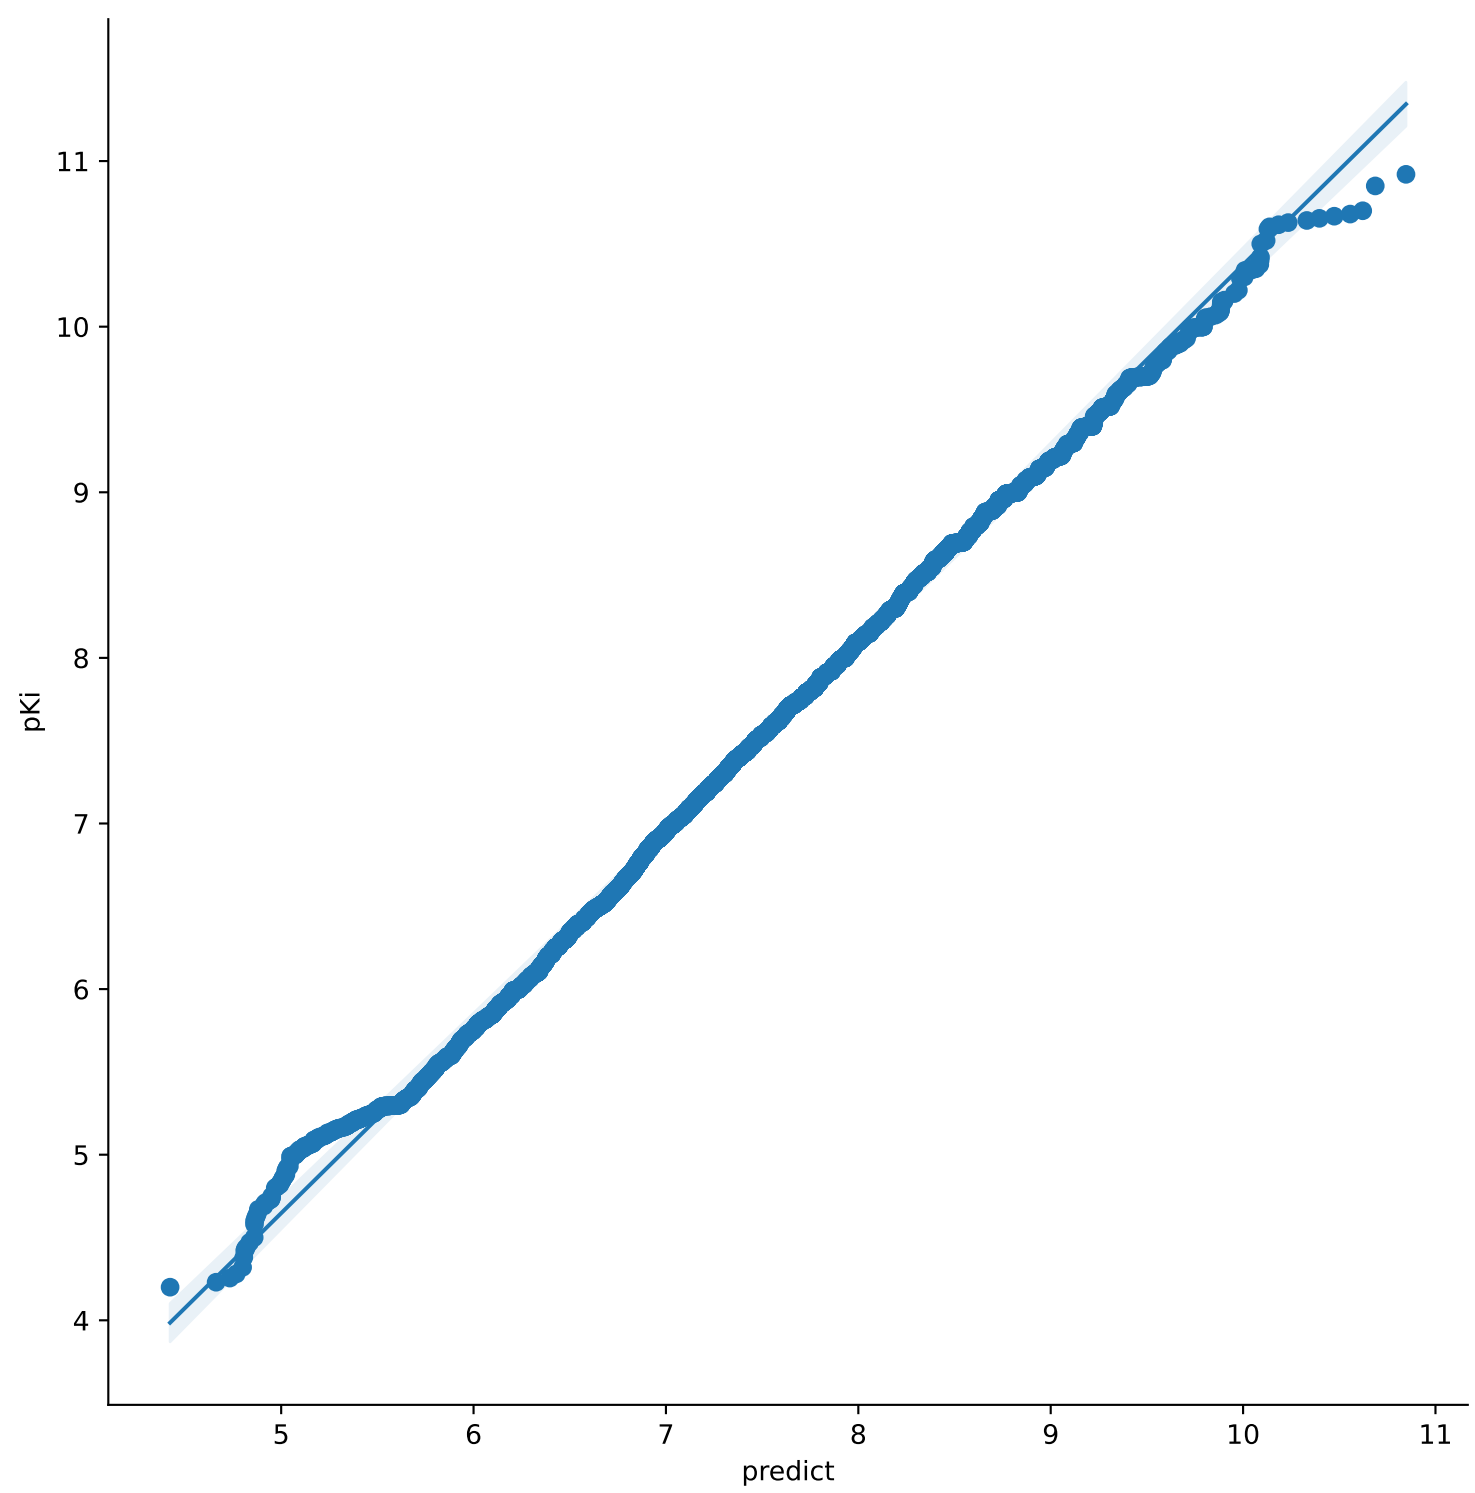

Supplement: s1 [file s1]
